# Supplementary material for: Norwegian Platform for Production of Antiviral Chicken Egg Yolk Immunoglobulins for Viral Pandemics Preparedness
Source: Preprints.org preprint supplement (doi:10.20944/preprints202206.0411.v1), 2022-06-30
Supplement: Supplementary file 1 [file supplementary]

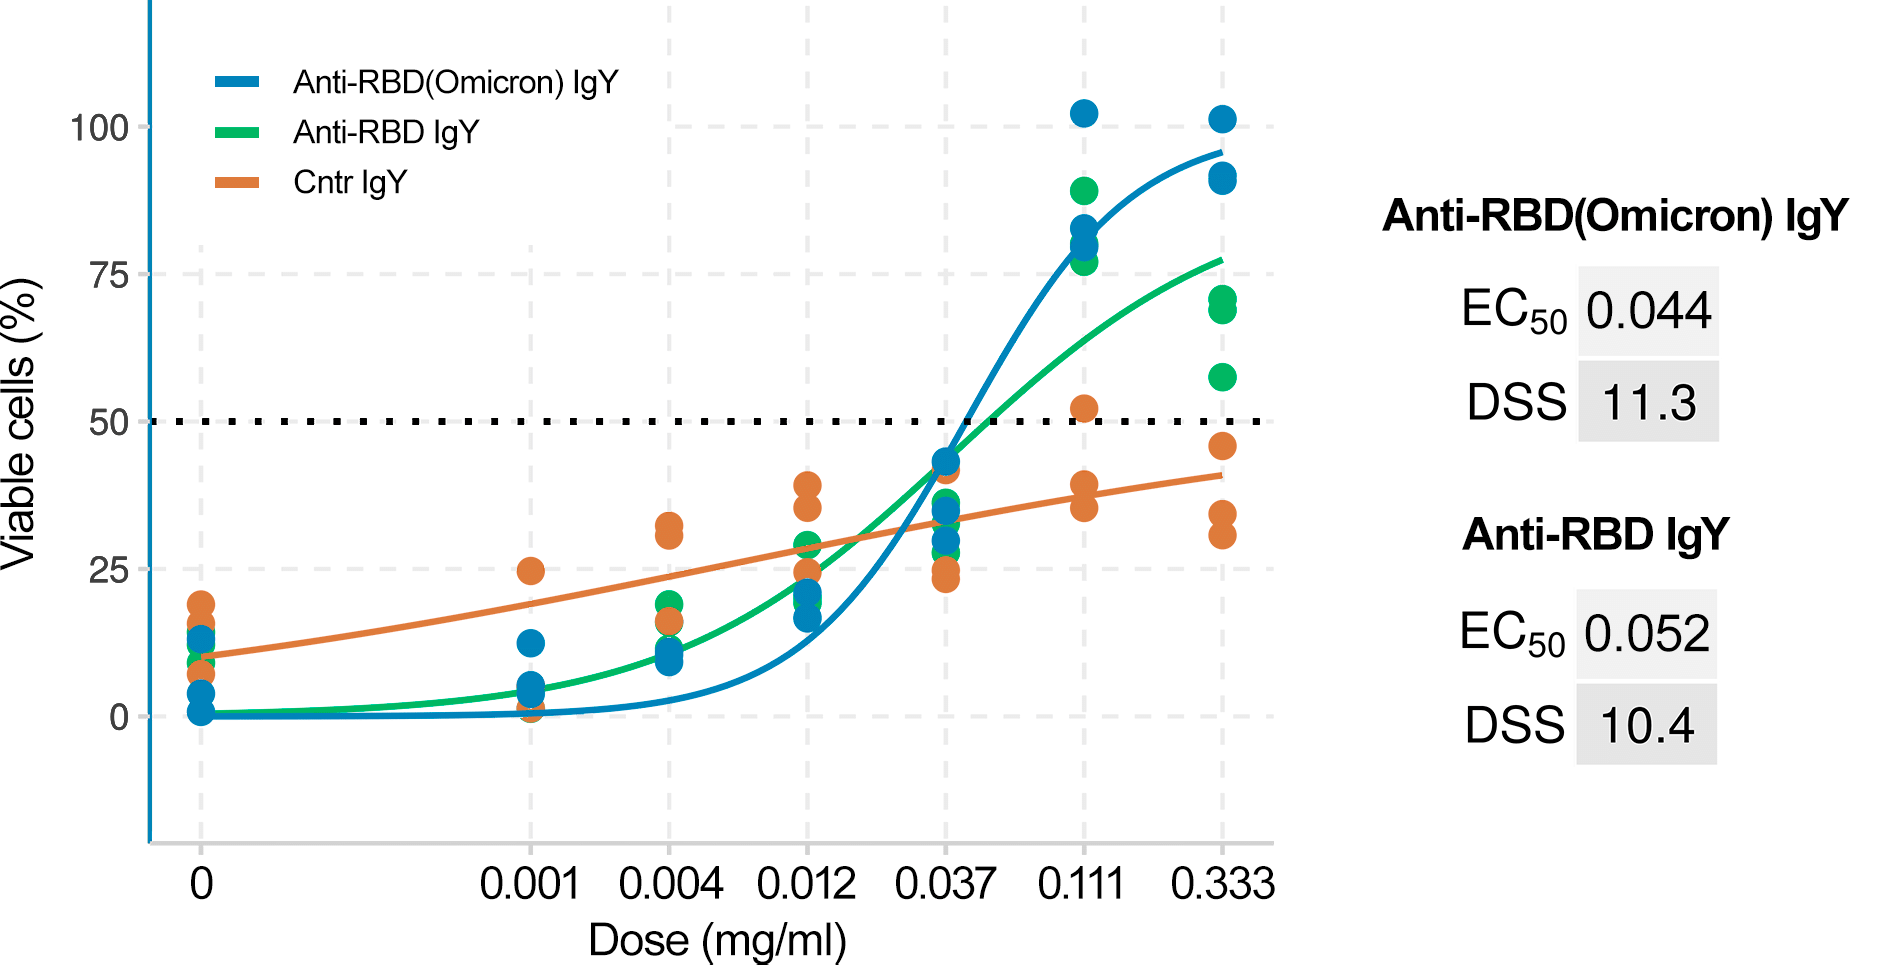


**Figure S1**. IgY antibodies raised against receptor-binding domains (RBD) of spike glycoproteins of Wuhan and Omicron variants neutralize SARS-CoV-2/Omicron virus *in vitro*. Neutralization capacity of anti-RBD(Omicron), anti-RBD(Wuhan) or control non-immune IgY was measured by monitoring viability of Vero-E6 cells after 48 h of infection with mCherry-expressing SARS-CoV-2 strain. Mean ± SD; n = 3.
